# Supplementary material for: CD36+ cancer-associated fibroblasts provide immunosuppressive microenvironment for hepatocellular carcinoma via secretion of macrophage migration inhibitory factor
Source: PubMed Central journal article supplement (PMC9988869; doi:10.1038/s41421-023-00529-z), 2023-03-06
Supplement: 41421_2023_529_MOESM1_ESM.pdf [file 41421_2023_529_MOESM1_ESM.pdf]

# 1 Supplementary figures

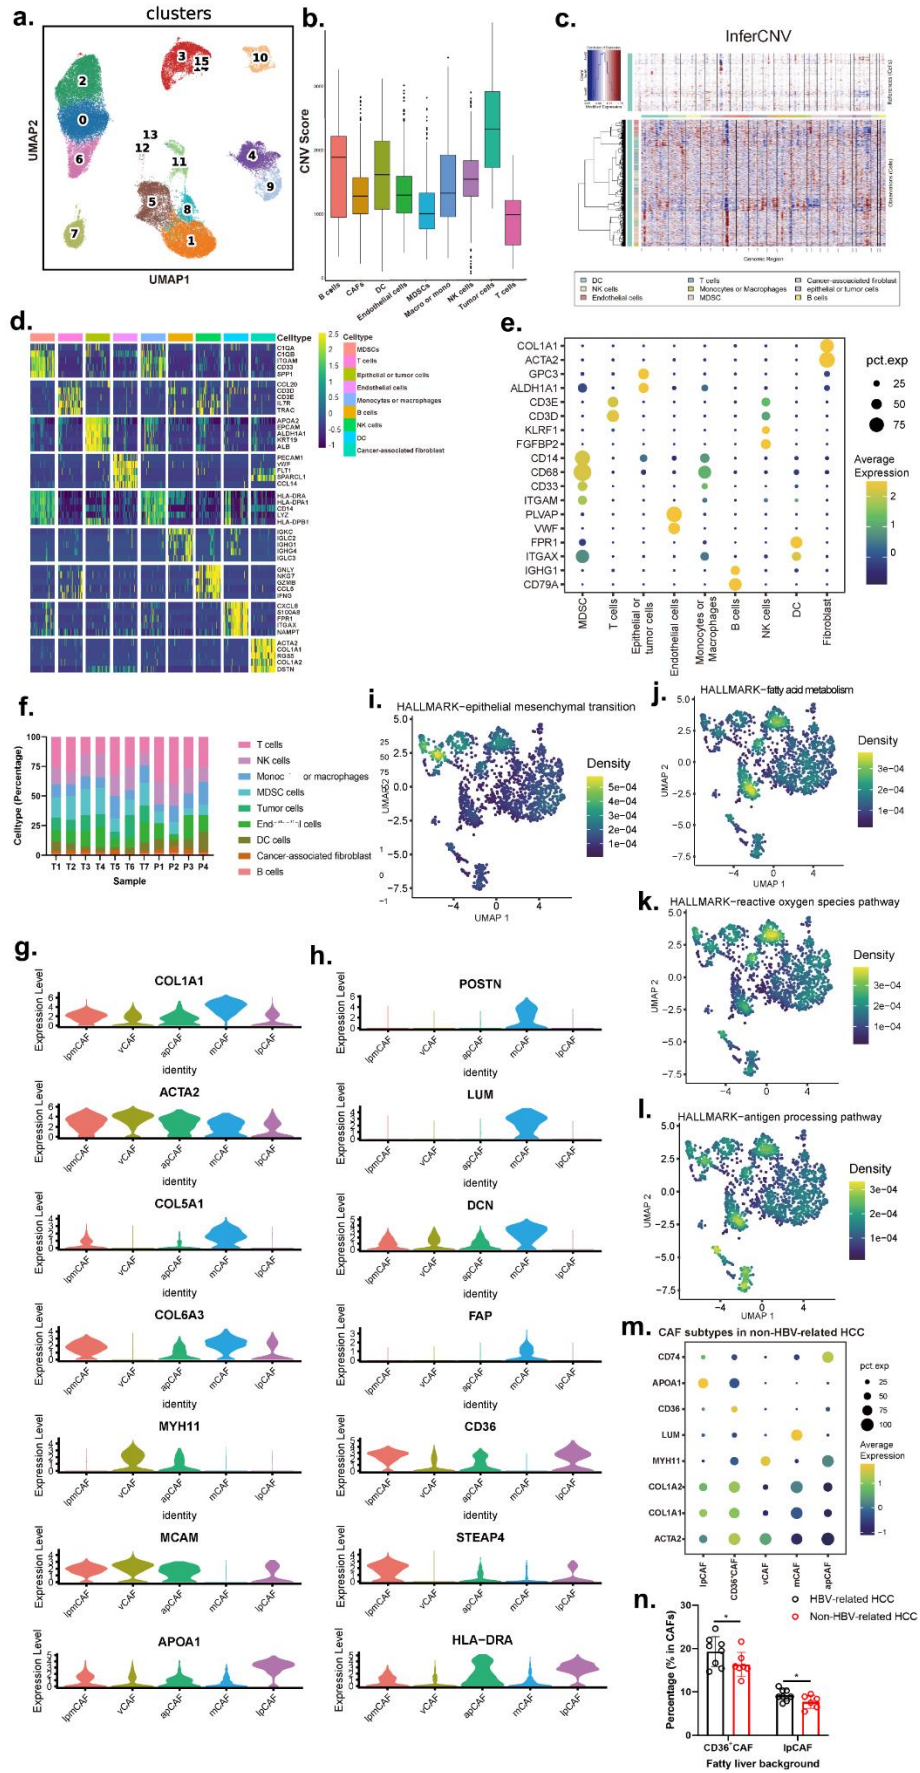

---

1 **Supplementary Fig. S1.** The marker genes and pathway activity of CAF subtypes in  
2 human HCC tumors.

3 (a) UMAP plots for the different clusters identification of single cells. (b) Box plots  
4 showing the CNV signals for each cell type. (c) Heatmap plots showing the CNV  
5 signals for each cell type. (d) Heatmap showing the top DEGs (Wilcoxon test) in each  
6 cell type. (e) Dotplots showing cell marker genes in each cell types. (f) Bar plots  
7 showing the proportion of cell types in each sample. (g-h) Violin plots showing gene  
8 markers in different CAF subtypes. (i-l) UMAP plots showing pathway activity for  
9 different human CAF subtypes. (m) Dotplots showing cell marker genes of each CAF  
10 subtypes in non-HBV-related HCC. (n) Box plot showing the proportions of  
11 CD36+CAFs and lpCAFs in fatty liver background of HBV-related HCC or non-  
12 HBV-related HCC by mIF. CNV, copy number variation; DEGs, differentially  
13 expressed genes; HCC, hepatocellular carcinoma; scRNA-seq, single-cell RNA-  
14 sequencing; UMAP, uniform manifold approximation and projection.

15

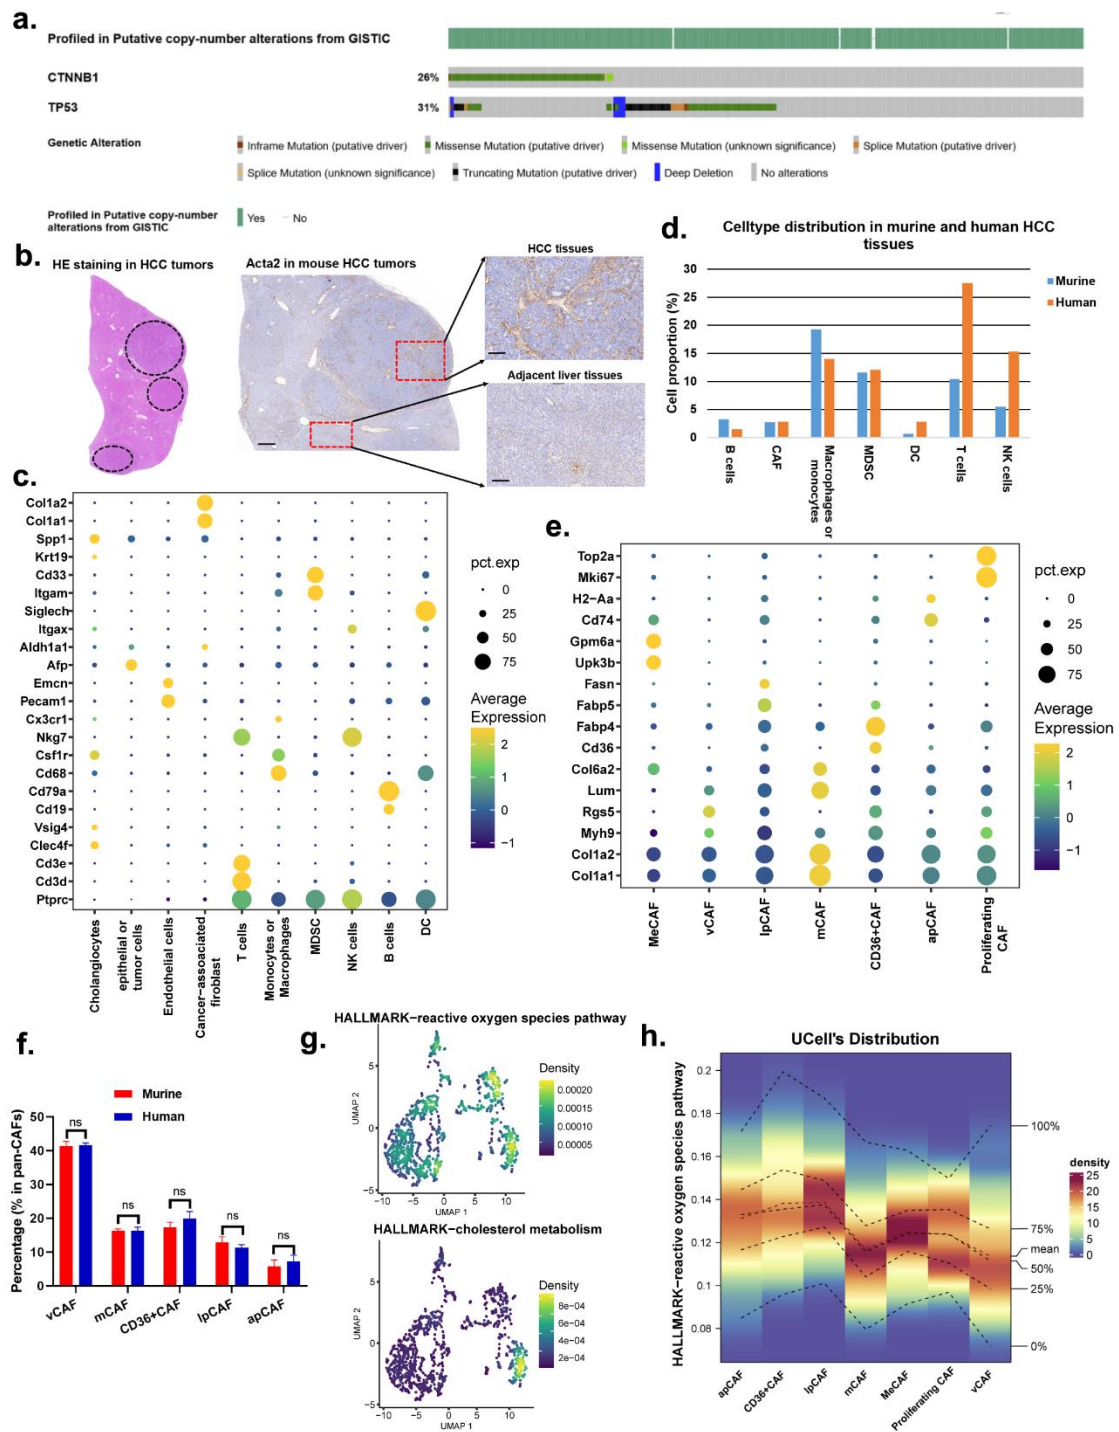

1

2 **Supplementary Fig. S2.** The marker genes and pathway activity of CAF subtypes in  
 3 murine HCC tumors.

4 (a) The mutation landscape of CTNNB1 and TP53 in TCGA HCC databases. (b) HE  
 5 staining and representative image of IHC for Acta2 in murine HCC tissues. (c)

6 Dotplots show marker genes in different cell types in murine HCC tumors. (d) The

1 comparison of major cell types between human and murine HCC tumors. (e) Dotplots  
 2 show marker genes in different CAF subtypes in murine HCC tumors. (f) The  
 3 comparison of major CAF subtypes between human and murine HCC tumors. (g)  
 4 UMAP plots show enriched pathways in human CAF clusters. (h) UCell's distribution  
 5 in different CAF subtypes for murine HCC tumors.

6

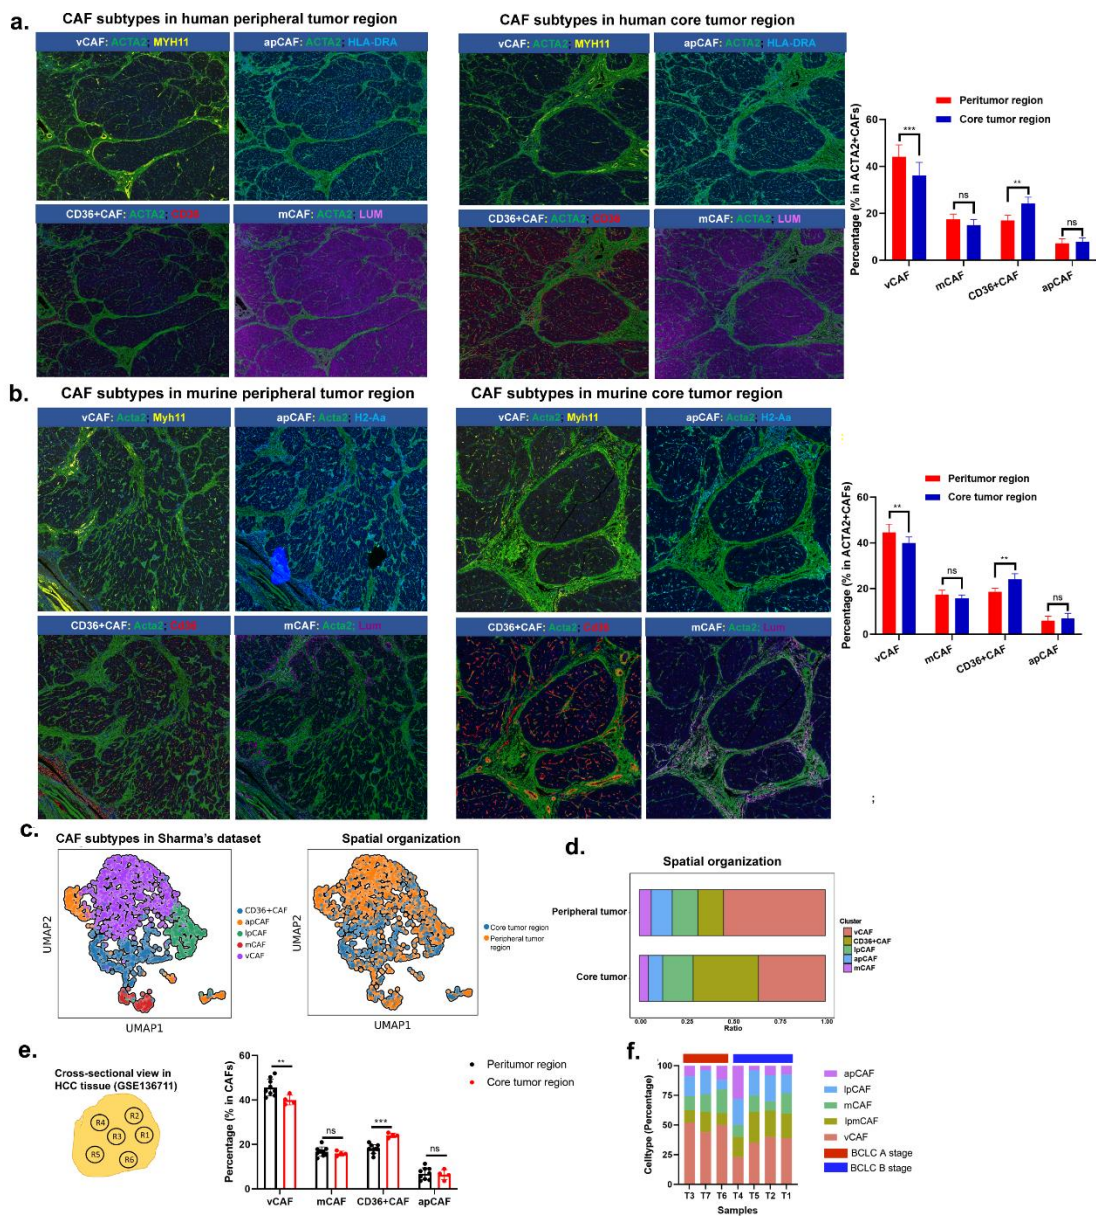

7

8 **Supplementary Fig. S3. The CAF heterogeneity of spatial in human and mouse HCC**  
 9 tumors.

---

1 (a-b) Multiplex immunofluorescence staining shows spatial distribution of CAF  
2 subtypes in human (a) or murine (b) HCC tumors. (c-d) The spatial organization of  
3 CAF subtypes by Sharma's scRNA-seq dataset. (e) The spatial heterogeneity analysis  
4 of CAF subtypes in HCC tumors by CIBERSOTx. (f) Bar plots show CAF clusters in  
5 different tumor regions within HCC samples.  
6

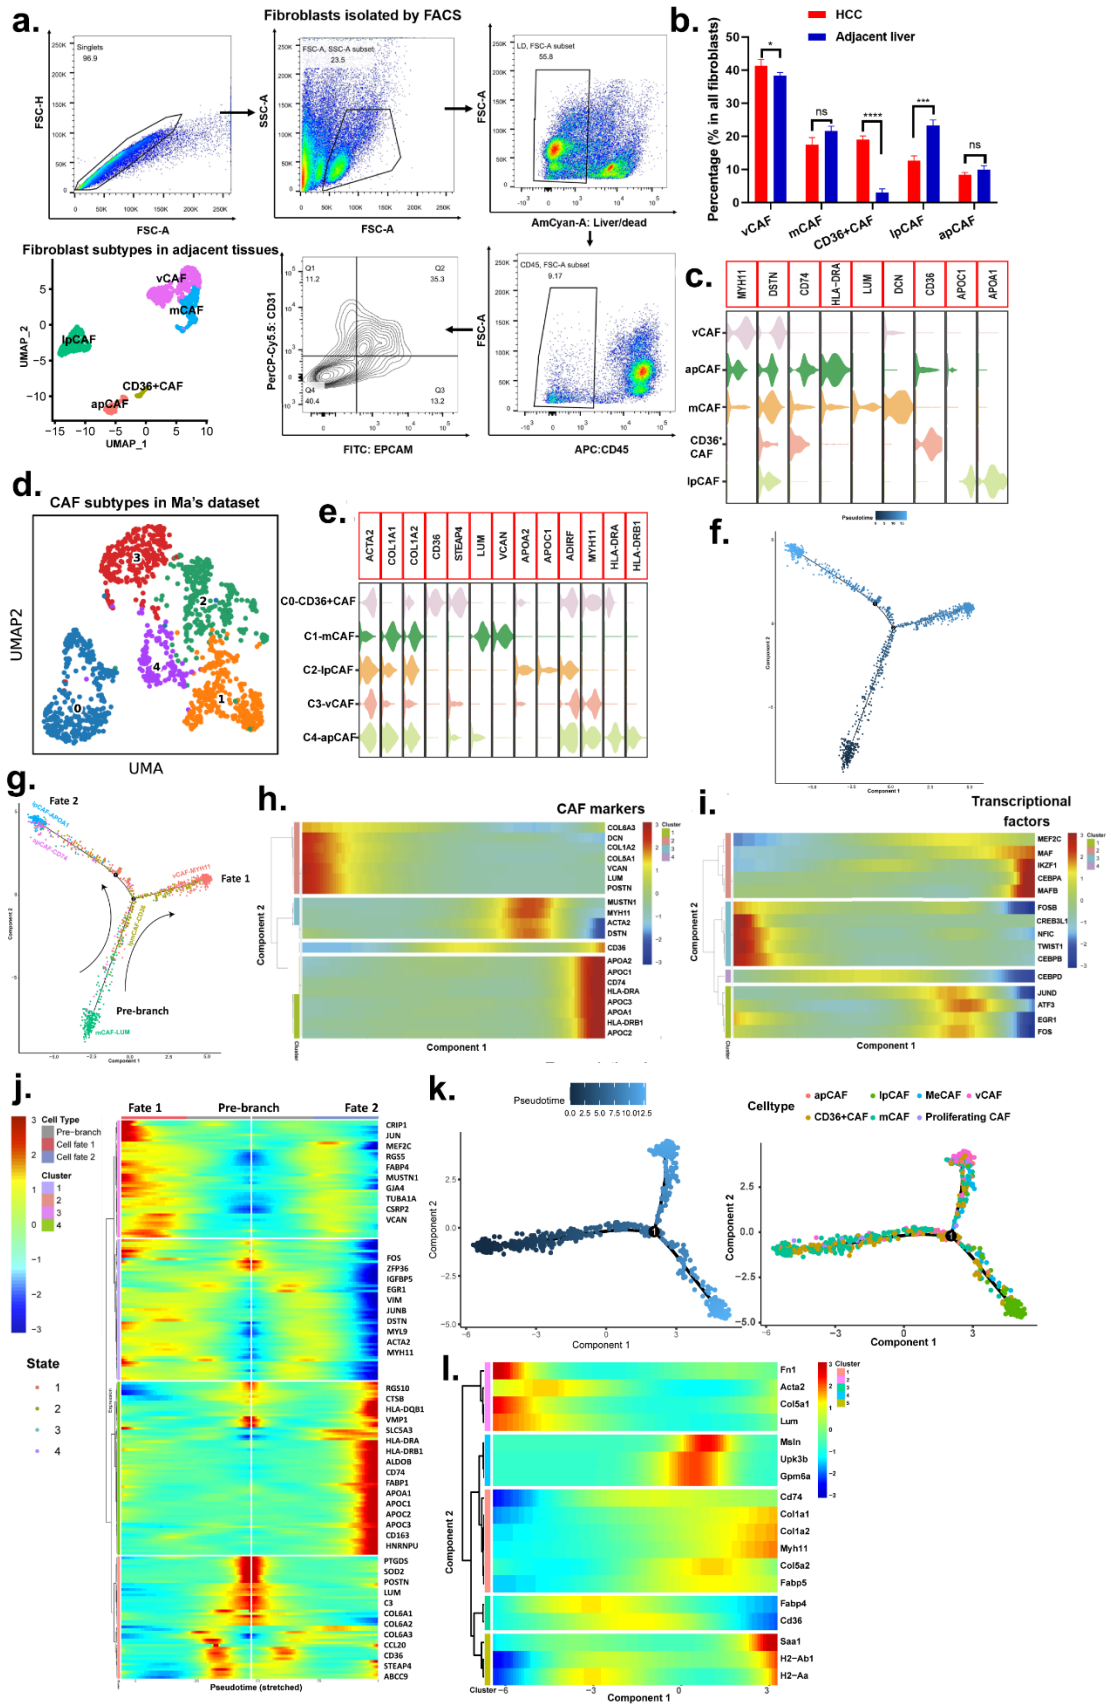

1

2 **Supplementary Fig. S4.** The CAF distribution and time trajectory of CAF subtypes

3 in HCC tissues.

---

1 (a) The fibroblasts clusters in human adjacent liver tissues by FACS. (b) The  
2 comparison of fibroblasts clusters between HCC and adjacent liver tissues from  
3 scRNA-seq data by FACS. (c) Violin plot for CAF subtypes from adjacent liver  
4 tissues from scRNA-seq by FACS. (d) The UMAP plot shows CAF subclusters in Ma  
5 et al.'s scRNA-seq data (GSE151530). (e) Violin plot for CAF subtypes in Ma et al.'s  
6 scRNA-seq data. (f-g) Trajectory of differentiation process colored by states and cell  
7 types. (h) Heatmap shows upregulated or downregulated CAF marker genes in the  
8 differentiation process. (i) Heatmap shows upregulated or downregulated  
9 transcriptional factors enriched in different CAFs in the differentiation process. (j)  
10 Heatmap shows upregulated or downregulated CAF marker genes in the  
11 differentiation process. (k) Trajectory of differentiation process colored by states and  
12 cell types for CAF subtypes from murine HCC tumors. (l) Heatmap shows  
13 upregulated or downregulated CAF marker genes in the differentiation process for  
14 murine HCC tumors.

15

a.

Cellular interaction analysis in human HCC TME

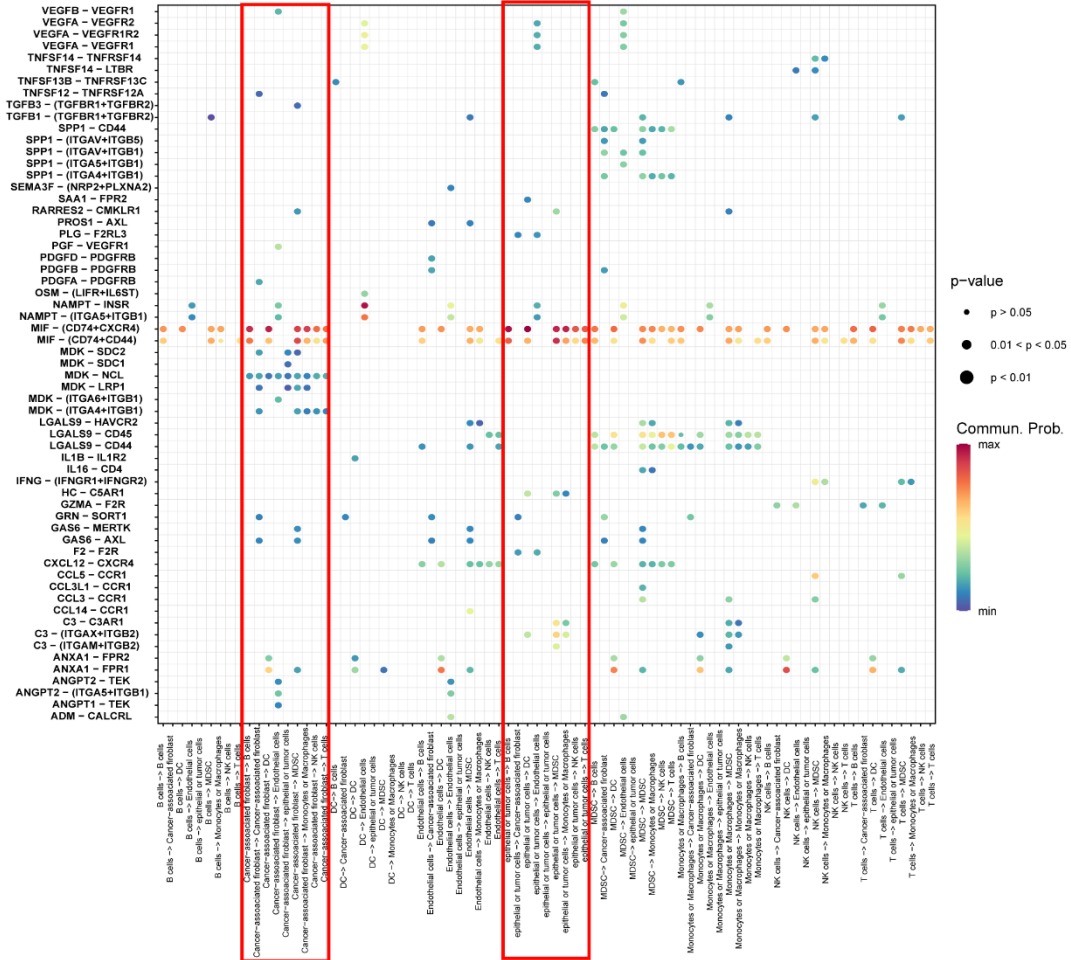

b.

Cellular interaction analysis in murine HCC TME

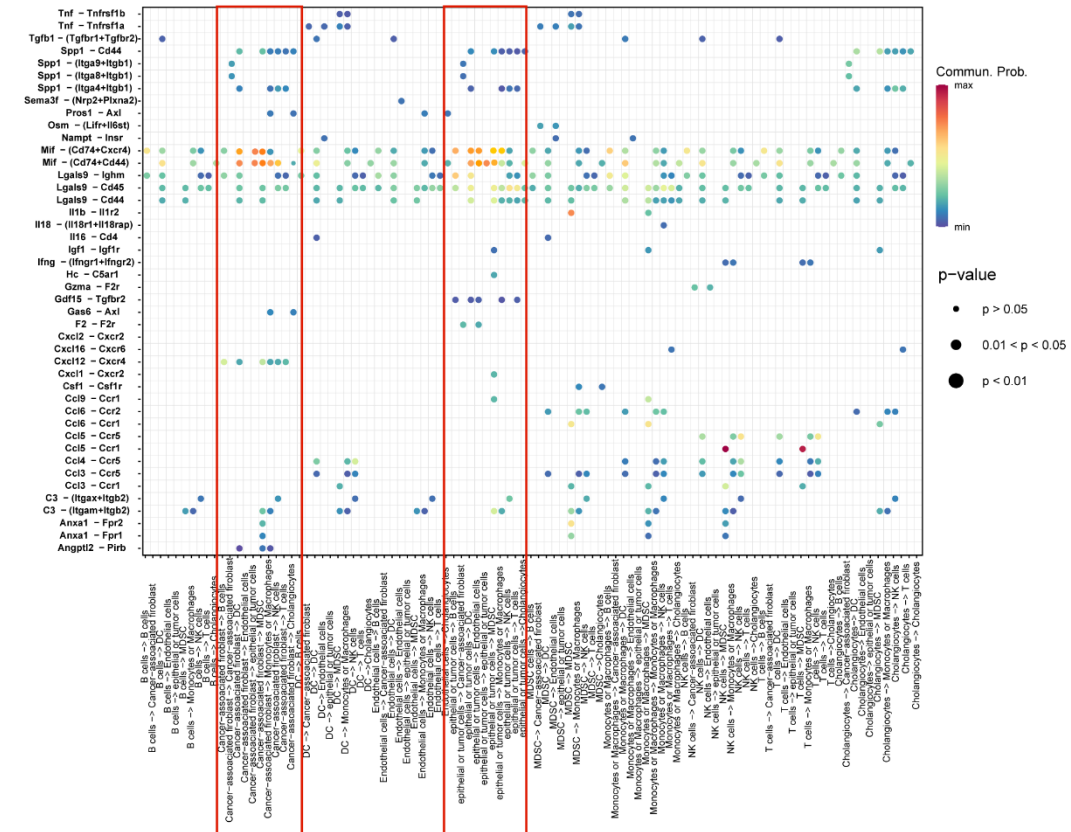



- 
- 1 **Supplementary Fig. S5.** Cell interaction analysis between all distinct cell types in  
2 human or murine HCC microenvironment.
- 3 (a) Dotplot shows pair-ligands between all distinct cell types in human HCC tumors.  
4 Red box indicates CAFs and tumor cells acting on other cell types.
- 5 (b) Dotplot shows pair-ligands between all distinct cell types in murine HCC tumors.  
6 Red box indicates CAFs and tumor cells acting on other cell types.
- 7

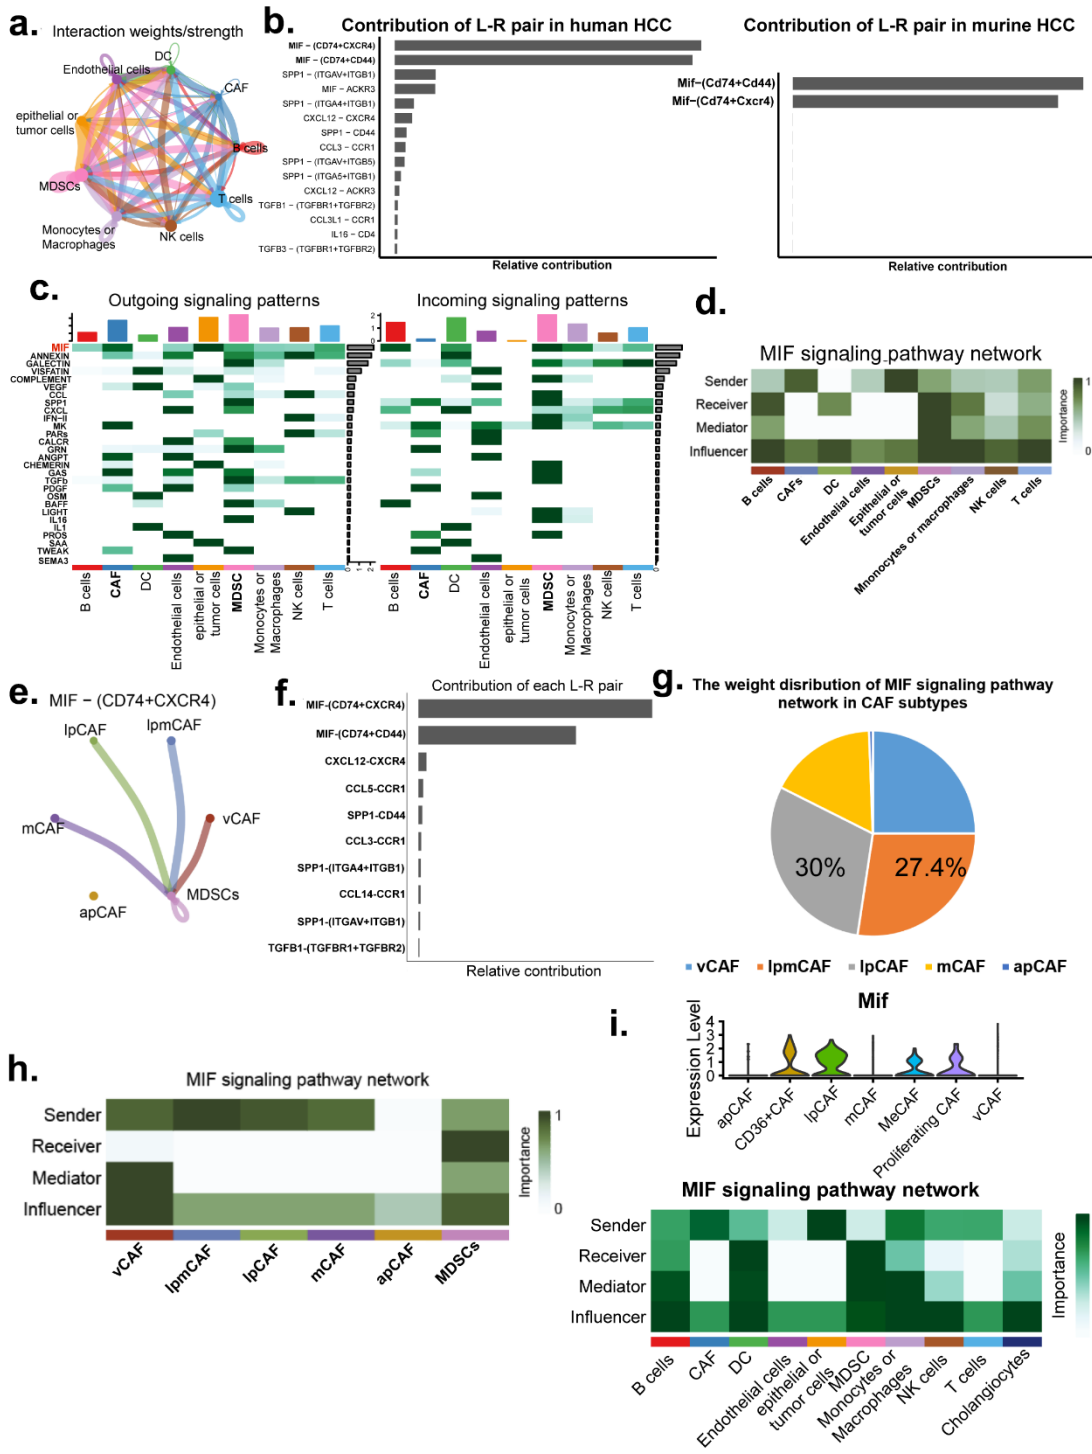

1

2 **Supplementary Fig. S6. Cell interaction analysis between CAF and other distinct cell**

3 types.

4 (a) The interaction weights/strength between different cell types. (b) The contribution

5 of ligand-receptor pair in human and murine HCC tumors. (c) Heatmap shows genes

6 involving pair-ligands in different cell types for human HCC tumors. (d) MIF

---

1 signaling pathway network in all cell types for human HCC tumors. (e) MIF signaling  
2 pathway network between CAF subtypes and MDSCs in human HCC tumors. (f) The  
3 contribution of each L-R pair between CAF subtypes and MDSCs. (g) The weight  
4 distribution of MIF signaling pathway network between CAF subtypes and MDSCs.  
5 (h) MIF signaling pathway network between CAF subtypes and MDSCs in human  
6 HCC tumors. (i) MIF signaling pathway network and expression between all cell  
7 types in murine HCC tumors.  
8

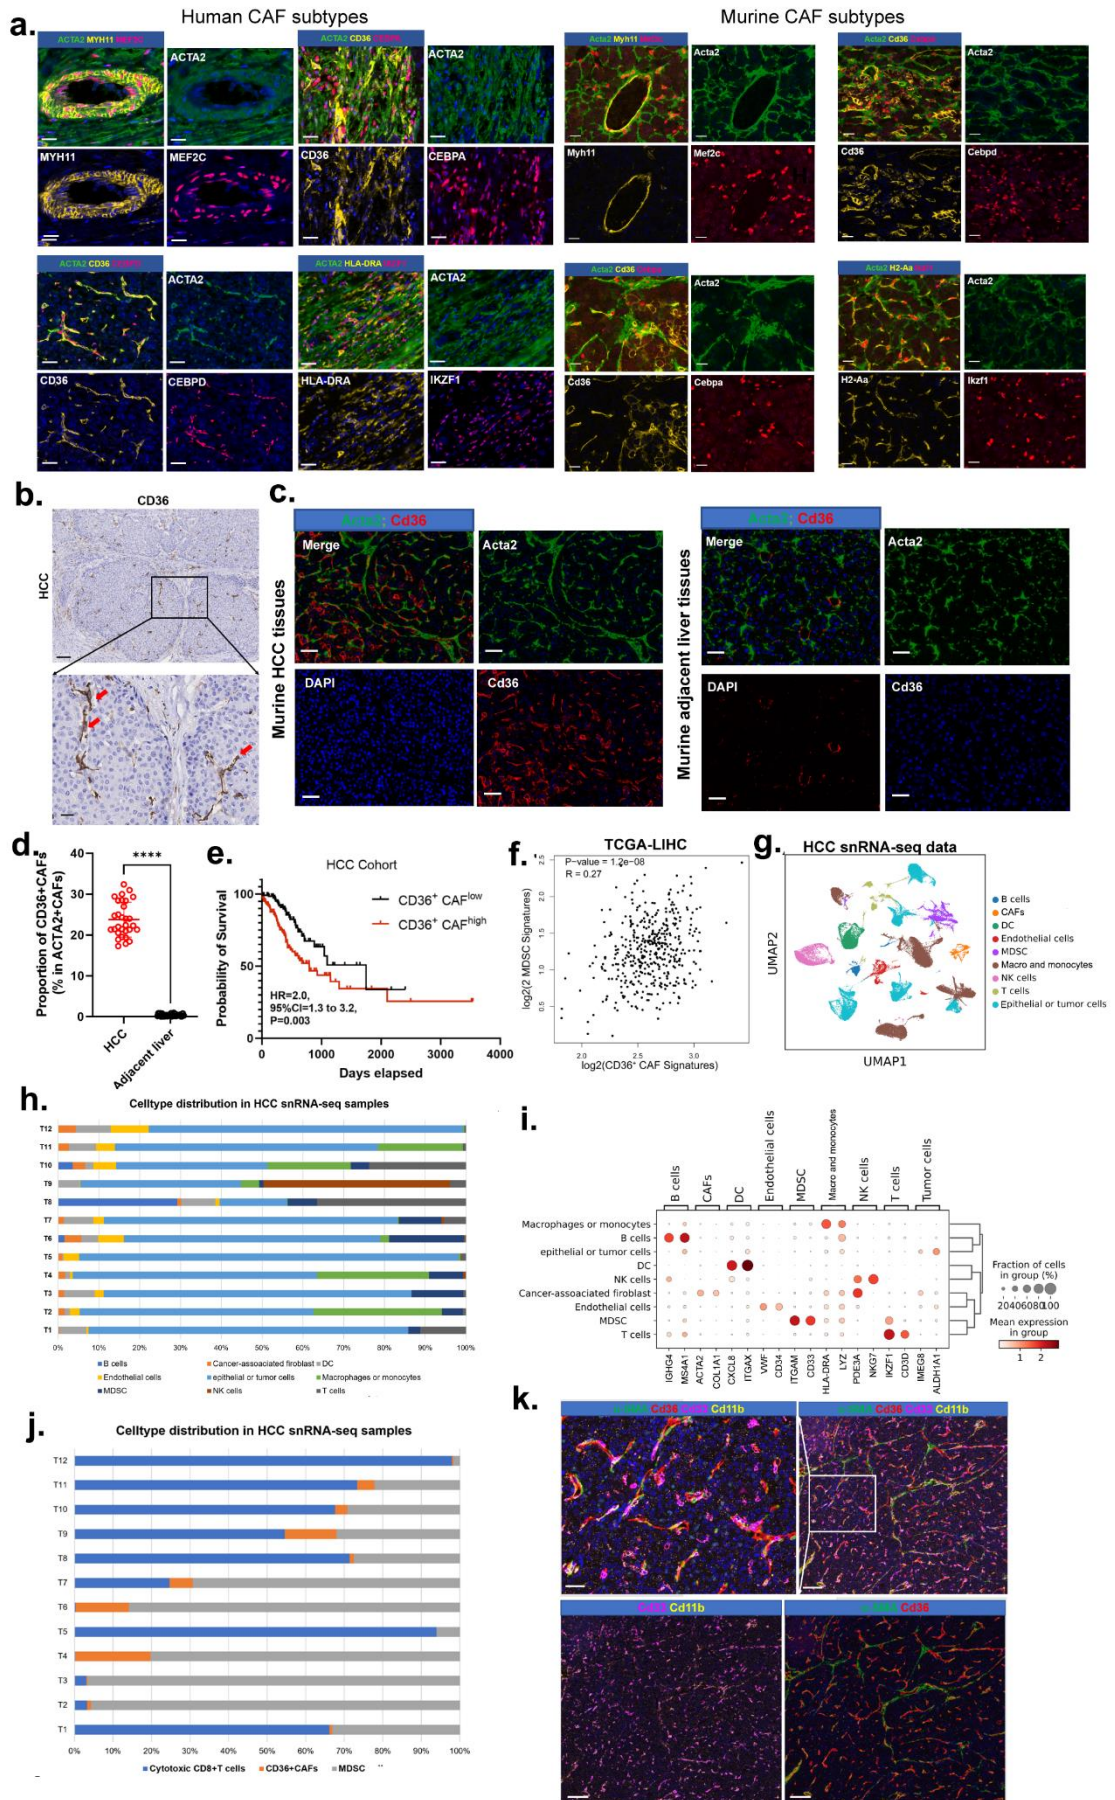

---

1 **Supplementary Fig. S7.** CAF subtype-specific transcription factors and the  
2 interactions between different CAFs and MDSCs.

3 (a) Multiplex immunofluorescence staining showed top expressed transcriptional  
4 factors in different CAF subtypes from murine and human HCC tumors. (b) CD36  
5 expression in HCC tissues by IHC experiments. (c) Multiplex immunofluorescence  
6 staining shows CD36<sup>+</sup> CAF was infiltrated less in adjacent tissues. (d) CD36<sup>+</sup> CAFs  
7 infiltrated more in HCC tissues than adjacent tissues. \*P <0.05, \*\*P <0.01, \*\*\*P  
8 <0.001 by Student's t-test. (e) High proportion of CD36<sup>+</sup> CAFs predict worse  
9 prognosis in HCC patients. (f) CD36<sup>+</sup> CAFs correlate with MDSCs in TCGA datasets.  
10 (g) UMAP plot showed distinct cell types in HCC snRNA-seq data. (h) The dotplot  
11 showed specific gene markers in distinct cell types from HCC snRNA-seq data. (i)  
12 Celltype distribution in HCC snRNA-seq samples. (j) The cytotoxic CD8<sup>+</sup> T cells,  
13 CD36<sup>+</sup>CAF and MDSCs in different snRNA-seq samples. (k) Multiplex  
14 immunofluorescence staining shows CD36<sup>+</sup> CAF interacted with MDSCs in murine  
15 HCC tissues.

16

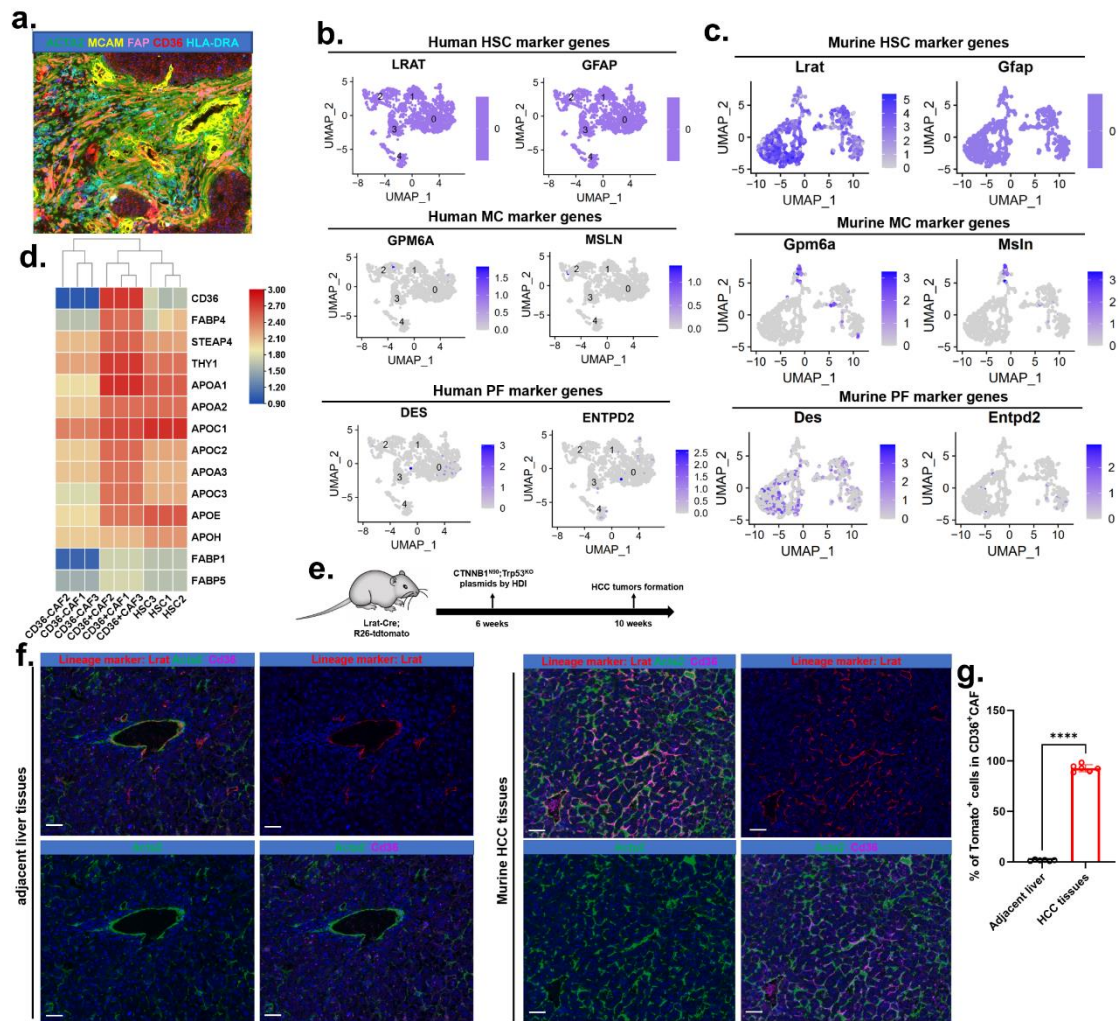

1 **Supplementary Fig. S8.** The cellular origin of CD36+CAFs in murine HCC models.

2 (a) The cell surface markers of CAF subtypes in HCC tumors. (b) The expression of  
 3 specific genes for hepatic stellate cells, mesenchymal cell, portal fibroblasts in human  
 4 CAF scRNA-seq data. (c) The expression of specific genes for hepatic stellate cells,  
 5 mesenchymal cell, portal fibroblasts in murine CAF scRNA-seq data. (d) Heatmap  
 6 showed genes related to lipid metabolism highly expression in CD36+CAFs and  
 7 hepatic stellate cells when compared with CD36-CAFs. (e) The schematic diagram  
 8 showed established spontaneous HCC in Lrat-Cre; R26-tdtomato mice. (f-g)

9 Multiplex immunofluorescence staining showed CD36+CAFs originated from hepatic  
 10 stellate cells in HCC tumors. Data are mean  $\pm$  s.d. of n=6 independent experiments.

11 \*\*\*\*P < 0.0001 by Student's t-test.

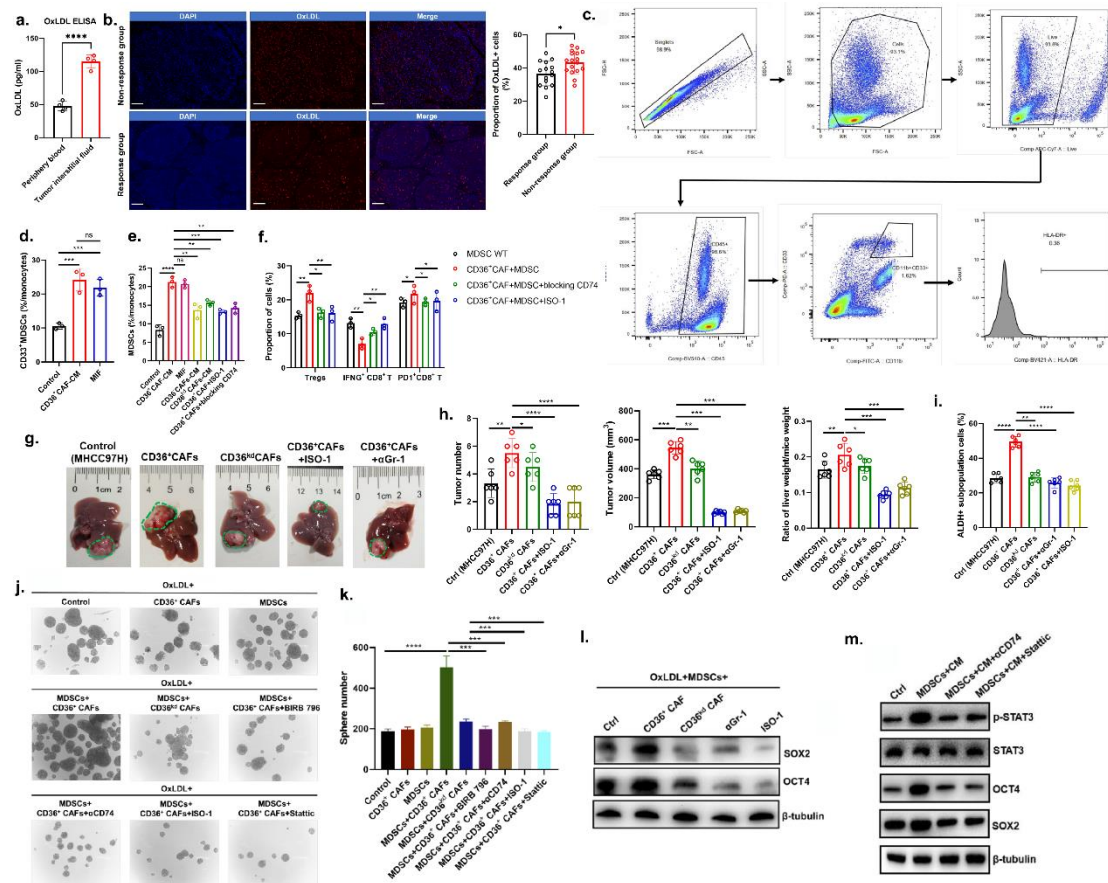

1

2 **Supplementary Fig. S9.** CD36<sup>+</sup> CAF-derived MIF potentiates the capacity of  
 3 MDSCs to promote tumor stemness in HCC.  
 4 (a) The levels of OxLDL between periphery blood and tumor interstitial fluid by  
 5 ELISA assays. (b) The OxLDL<sup>+</sup> cells between anti-PD-1 response and non-response  
 6 group by IF assays. (c) The strategies for MDSCs by flow cytometry in human HCC  
 7 tissues. (d) Human MDSC proportion was measured by flow cytometry when co-  
 8 cultured with Ctrl, CD36<sup>+</sup> CAFs, MIF recombinant protein. (e) Murine MDSC  
 9 proportion was measured by flow cytometry when co-cultured with Ctrl, CD36<sup>+</sup>  
 10 CAFs, MIF, CD36<sup>-</sup> CAFs, CD36<sup>kd</sup> CAFs, a combination of CD36<sup>+</sup> CAFs and MIF  
 11 inhibitor ISO-1, or a combination of CD36<sup>+</sup> CAFs and CD74 blocking agents. (f) The  
 12 proportion of IFN $\gamma$ <sup>+</sup> or PD1<sup>+</sup>CD8<sup>+</sup> T cells and Tregs were evaluated in MDSCs-WT,  
 13 CD36<sup>+</sup>CAFs+MDSCs, a combination of CD36<sup>+</sup>CAFs+MDSCs and ISO-1 or  
 14 blocking CD74 by flow cytometry. (g) Representative images of HCC tumors from

1 the orthotopic HCC model. (h) Tumor numbers, tumor volume and ratio of liver  
 2 weight and mice weight from the orthotopic HCC model. CAFs transduced with the  
 3 empty lentiviral vector as a control. (i) ALDH<sup>+</sup> cells of HCC nodules. CAFs  
 4 transduced with the empty lentiviral vector as a control. (j-k) Representative images  
 5 and tumorsphere formation efficiencies. (l) Western blotting assay show stemness  
 6 marker genes for different treating groups. (m) Western blotting assay show stemness  
 7 marker genes and STAT3 expression for different treating groups. Data shown as  
 8 mean  $\pm$  S.E.M., one-way ANOVA following multiple comparison test was used, \*\*\*p  
 9 < 0.001, \*\* p < 0.01, \*p < 0.05, and ns = not significant.

10

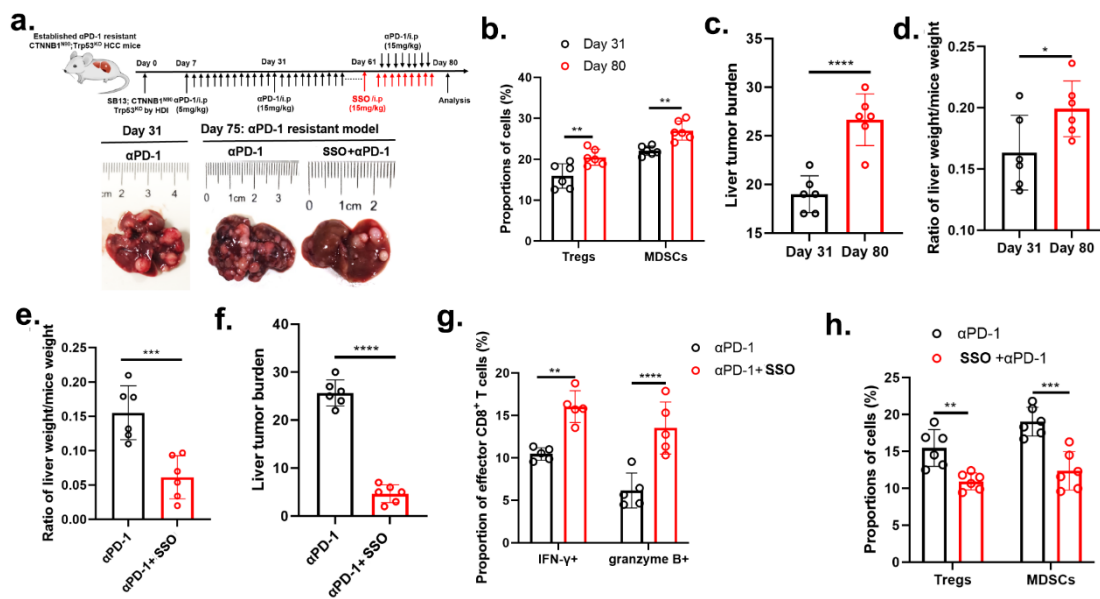

11

12 **Supplementary Fig. S10.** Targeting CD36 synergizes with immunotherapy in  
 13 different HCC murine models.

14 (a) CD36 inhibitor SSO synergizes PD-1 blockade in C57/BJ6 anti-PD-1 resistant  
 15 spontaneous HCC model. (b) The changes of Tregs and MDSC in Day 31 and Day 81  
 16 HCC spontaneous murine model. (c-d) The tumor burden and ratio of tumor weight  
 17 and mice weight in Day 31 and Day 81 HCC spontaneous murine model. (e-f) The



1 tumor burden and ratio of tumor weight and mice weight in anti-PD-1 and anti-PD-1  
 2 combined with SSO from HCC spontaneous murine model. (g-h) The changes of  
 3 Tregs, MDSCs, IFN- $\gamma^+$ , GZMB $^+$  CD8 $^+$  T cells in two groups. Data shown as mean  $\pm$   
 4 S.E.M., one-way ANOVA following multiple comparison test was used, \*\*\*p < 0.001,  
 5 \*\* p < 0.01, \*p < 0.05, and ns = not significant.

6

## 7 **Supplementary tables**

8 **Supplementary Table S1. The baseline characteristics of 7 HBV-related HCC**  
 9 **patients.**

| <b>Sample ID</b>              | T1         | T2        | T3       | T4           | T5       | T6       | T7       |
|-------------------------------|------------|-----------|----------|--------------|----------|----------|----------|
| <b>Age</b>                    | 66         | 54        | 58       | 64           | 77       | 41       | 54       |
| <b>Gender</b>                 | Male       | Male      | Male     | Male         | Male     | Male     | Male     |
| <b>HBsAg</b>                  | Positive   | Positive  | Positive | Positive     | Positive | Positive | Positive |
| <b>Diagnosis</b>              | HCC        | HCC       | HCC      | HCC          | HCC      | HCC      | HCC      |
| <b>Tumor number</b>           | 2          | 2         | 1        | 2            | 2        | 1        | 1        |
| <b>Tumor diameter (cm)</b>    | 17*16/14*1 | 10*8/3.7* | 3.9*3.2  | 8*4.5/3.8*2. | 7*6/4.5* | 3.5*3.5  | 3.5*2.9  |
| <b>Tumor grade</b>            | III        | II        | III      | II           | II       | II       | II       |
| <b>Tumor encapsulation</b>    | Yes        | No        | Yes      | Yes          | No       | No       | Yes      |
| <b>Microvascular invasion</b> | Yes        | Yes       | No       | No           | Yes      | Yes      | Yes      |
| <b>Macrovascular invasion</b> | No         | No        | No       | No           | No       | No       | No       |
| <b>GPC3 status</b>            | Positive   | Positive  | Positive | Negative     | Positive | Negative | Positive |
| <b>Liver metastasis</b>       | Yes        | Yes       | Yes      | No           | Yes      | No       | Yes      |

---

---

**cirrhosis**

**BCLC stage**    B                    B                    A                    B                    B                    A                    A

---

1

2 **Supplementary Table S2. The list of cell markers in human HCC scRNA-seq**

3 **data.**

---

| <b>Cell types</b>                        | <b>Top10 cell markers</b> |        |      |       |       |       |       |      |       |       |
|------------------------------------------|---------------------------|--------|------|-------|-------|-------|-------|------|-------|-------|
| <b>MDSC</b>                              | SPP1                      | RNASE  | C1QA | C1QB  | LGMN  | SLC40 | C1QC  | CTSB | CD33  | ITGA  |
|                                          |                           | 1      |      |       |       | A1    |       |      |       | M     |
| <b>T cells</b>                           | CCL20                     | LTB    | IL7R | CD2   | TRAC  | TRBC2 | IL32  | CD3D | KLRB1 | BCL11 |
|                                          |                           |        |      |       |       |       |       |      |       | B     |
| <b>Epithelial<br/>or tumor<br/>cells</b> | APOA2                     | RBP4   | ORM  | EPCAM | AMBP  | APOC2 | ALB   | H19  | CLU   | AHSG  |
|                                          |                           |        | 1    |       |       |       |       |      |       |       |
| <b>Endothelial<br/>cells</b>             | STC1                      | PLVAP  | SPRY | SPARC | PECA  | TM4SF | CALCR | FLT1 | VWF   | CCL14 |
|                                          |                           |        | 1    | L1    | M1    | 1     | L     |      |       |       |
| <b>Mono or<br/>Macro<br/>B cells</b>     | HLA-                      | HLA-   | CST3 | HLA-  | LYZ   | CD74  | AIF1  | HLA- | C1QB  | HLA-  |
|                                          | DRA                       | DPA1   |      | DPB1  |       |       |       | DQA  |       | DRB1  |
|                                          |                           |        |      |       |       |       |       | 1    |       |       |
|                                          | IGKC                      | IGLC2  | IGHG | IGLC3 | IGLC1 | IGHG2 | IGHA1 | IGHG | JCHAI | IGHG4 |
|                                          |                           |        | 1    |       |       |       |       | 3    | N     |       |
| <b>NK cells</b>                          | GNLY                      | NKG7   | GZM  | CCL5  | IFNG  | KLRD1 | FGFBP | GZM  | CCL4  | CST7  |
|                                          |                           |        | B    |       |       |       | 2     | H    |       |       |
| <b>DC</b>                                | CXCL8                     | S100A8 | G0S2 | ITGAX | NAMP  | LUCAT | BASP1 | FPR1 | FCGR3 | PTGS2 |

---

|             | T     | 1    | B    |       |       |       |       |     |       |      |
|-------------|-------|------|------|-------|-------|-------|-------|-----|-------|------|
| <b>CAFs</b> | ACTA2 | TAGL | RGS5 | COL1A | CALD1 | COL1A | COL3A | MGP | IGFBP | MYL9 |
|             | N     |      | 1    |       | 2     | 1     |       | 7   |       |      |

1

2 **Supplementary Table S3. The list of cell markers in murine HCC scRNA-seq**

3 **data.**

| Cell types                       | Top10 cell markers |        |        |        |       |        |           |           |        |         |
|----------------------------------|--------------------|--------|--------|--------|-------|--------|-----------|-----------|--------|---------|
| <b>Cholangiocytes</b>            | Clec4f             | Sdc3   | Cd51   | Psap   | Dmpk  | Lgmn   | Igha      | Slc40a1   | Spp1   | Clu     |
| <b>Epithelial or tumor cells</b> | Serpina1e          | Afp    | Apoa1  | Ahsg   | Alb   | Gstp1  | Serpina1d | Serpina3k | Rbp4   | Ttr     |
| <b>Endothelial cells</b>         | Pecam1             | Emcn   | Kdr    | Igfbp7 | Aqp1  | Gpihb  | Sparc     | Ly6c1     | Egfl7  | Timp3   |
| <b>CAFs</b>                      | Den                | Col1a1 | Col1a2 | Col3a1 | Sparc | Bgn    | Col14a1   | Igfbp7    | Cxcl1  | Igha    |
| <b>T cells</b>                   | Ccl5               | Trbc2  | Cd3d   | Cd3g   | Nkg7  | Hspa1b | Trac      | Ms4a4b    | Cd3e   | Dnajb   |
| <b>Mono or Macro</b>             | C1qb               | C1qa   | C1qc   | Ctss   | Lgals | Ms4a6c | Lyz2      | Vcam1     | H2-Ab1 | Cd68    |
| <b>MDSC</b>                      | Cd33               | Itgam  | Retnl  | Ngp    | Camp  | Ltf    | Cxcl2     | G0s2      | Il1b   | Pglyrp1 |
| <b>NK</b>                        | Gzma               | Xcl1   | Gzm    | Il2rb  | Nkg7  | Ccl5   | Klrl1     | Klrb1c    | Klre1  | Ccl4    |

| b              |         |      |      |      |       |       |       |       |       |       |
|----------------|---------|------|------|------|-------|-------|-------|-------|-------|-------|
| <b>B cells</b> | Igkc    | Cd79 | Ighm | Ebfl | Iglc2 | Cd74  | Cd79b | H2-Aa | Iglc3 | Ighd  |
| a              |         |      |      |      |       |       |       |       |       |       |
| <b>DC</b>      | Siglech | Irf8 | Klk1 | Ccr9 | Cox6  | Rnase | Gm217 | Tcf4  | St8si | Iglc3 |
|                |         |      |      |      | a2    | 6     | 62    |       | a4    |       |

1

2 **Supplementary Table S4. The list of PCR primers used in this study.**

| <b>ChIP assays primers sequences</b>    | <b>Sequence (5'→3')</b> |
|-----------------------------------------|-------------------------|
| CEBPD-MIF sense                         | CTGGCCAGGTAAGGCAACC     |
| CEBPD-MIF anti-sense                    | TCCCTGTGCCCTATGAAAGC    |
| CEBPA-MIF sense                         | AGCTGCAGGAACCAATACCC    |
| CEBPA-MIF anti-sense                    | CAGGTGCCAGGCATACAAGA    |
| IKZF1-CCL5 sense                        | TGGGAGAGACCCTATGACCA    |
| IKZF1-CCL5 anti-sense                   | AACCAAGCATTGGCCGGTA     |
| IKZF1-HLA-DRA sense                     | CAGGAGAGACCATGCTGTAGG   |
| IKZF1-HLA-DRA anti-sense                | AAGAGTGACCTGGCAGTGAGG   |
| <b>Real-time qPCR primers sequences</b> | <b>Sequence (5'→3')</b> |
| <b>Human</b>                            |                         |
| β-actin sense                           | GGGAAATCGTGCGTGACATTAAG |
| β-actin anti-sense                      | TGTGTTGGCGTACAGGTCTTTG  |
| MIF sense                               | TCTGCCATCATGCCGATGTT    |
| MIF anti-sense                          | GCTCTTAGGCGAAGGTGGAG    |

---

---

|                   |                        |
|-------------------|------------------------|
| ACTA2 sense       | AAAAGACAGCTACGTGGGTGA  |
| ACTA2 anti-sense  | GCCATGTTCTATCGGGTACTTC |
| COL1A1 sense      | GAGGGCCAAGACGAAGACATC  |
| COL1A1 anti-sense | CAGATCACGTCATCGCACAAC  |
| COL1A2 sense      | GTTGCTGCTTGCAGTAACCTT  |
| COL1A2 anti-sense | AGGGCCAAGTCCAACCTCCTT  |
| COL5A2 sense      | GACTGTGCCGACCCTGTAAC   |
| COL5A2 anti-sense | CCTGGACGACCACGTATGC    |
| COL6A3 sense      | ATGAGGAAACATCGGCACTTG  |
| COL6A3 anti-sense | GGGCATGAGTTGTAGGAAAGC  |
| COL5A1 sense      | GCCCGGATGTCGCTTACAG    |
| COL5A1 anti-sense | AAATGCAGACGCAGGGTACAG  |
| PDGFRB sense      | AGCACCTTCGTTCTGACCTG   |
| PDGFRB anti-sense | TATTCTCCCGTGTCTAGCCCA  |
| MYH11 sense       | CGCCAAGAGACTCGTCTGG    |
| MYH11 anti-sense  | TCTTCCCAACCGTGACCTTC   |
| DSTN sense        | ATTTTGTGGGAATGCTTCCTGA |
| DSTN anti-sense   | GCATCCTTGGAGCTTGCATAG  |
| MUSTN1 sense      | CCCGAGGAAACCTGACCAAG   |
| MUSTN1 anti-sense | CACTCTCGCATGACCTGGTAG  |
| MCAM sense        | AGCTCCGCGTCTACAAAGC    |
| MCAM anti-sense   | CTACACAGGTAGCGACCTCC   |

---

---

---

|                   |                         |
|-------------------|-------------------------|
| CD36 sense        | GGCTGTGACCGGAACTGTG     |
| CD36 anti-sense   | AGGTCTCCAAGTGGCATTAGAA  |
| FABP4 sense       | ACTGGGCCAGGAATTTGACG    |
| FABP4 anti-sense  | CTCGTGGAAAGTGACGCCTT    |
| STEAP4 sense      | GGCTTTGGGAATACTTGGGTT   |
| STEAP4 anti-sense | TGGACAAATCGGAACTCTCTCC  |
| THY1 sense        | ATCGCTCTCCTGCTAACAGTC   |
| THY1 anti-sense   | CTCGTACTGGATGGGTGAACT   |
| APOA1 sense       | CCCTGGGATCGAGTGAAGGA    |
| APOA1 anti-sense  | CTGGGACACATAGTCTCTGCC   |
| APOA2 sense       | CTGTGCTACTCCTCACCATCT   |
| APOA2 anti-sense  | CTCTCCACACATGGCTCCTTT   |
| APOC1 sense       | TCCAGTGCCTTGGATAAGCTG   |
| APOC1 anti-sense  | GGCTGATGAGTTCCCGAGC     |
| APOC2 sense       | TGTCCTCCTGGTATTGGGATTT  |
| APOC2 anti-sense  | TGTCTTCTCGTACAGGTTCTGG  |
| LUM sense         | TAAGTGCCTGAAAGCTACCC    |
| LUM anti-sense    | GGAGGCACCATTGGTACACTT   |
| FAP sense         | ATGAGCTTCCTCGTCCAATTCA  |
| FAP anti-sense    | AGACCACCAGAGAGCATATTTTG |
| DCN sense         | ATGAAGGCCACTATCATCCTCC  |
| DCN anti-sense    | GTCGCGGTCATCAGGAACTT    |

---

---

---

|                     |                         |
|---------------------|-------------------------|
| VCAN sense          | GTAACCCATGCGCTACATAAAGT |
| VCAN anti-sense     | GGCAAAGTAGGCATCGTTGAAA  |
| POSTN sense         | CTCATAGTCGTATCAGGGGTCG  |
| POSTN anti-sense    | ACACAGTCGTTTTCTGTCCAC   |
| TIMP1 sense         | CTTCTGCAATTCGGACCTCGT   |
| TIMP1 anti-sense    | ACGCTGGTATAAGGTGGTCTG   |
| HLA-DRA sense       | AGTCCCTGTGCTAGGATTTTCA  |
| HLA-DRA anti-sense  | ACATAAACTCGCCTGATTGGTC  |
| HLA-DRB1 sense      | CGGGGTTGGTGAGAGCTTC     |
| HLA-DRB1 anti-sense | AACCACCTGACTTCAATGCTG   |
| CD74 sense          | GACGAGAACGGCAACTATCTG   |
| CD74 anti-sense     | GTTGGGAAGACACACCAGC     |
| CCL5 sense          | CCAGCAGTCGTCTTTGTCAC    |
| CCL5 anti-sense     | CTCTGGGTTGGCACACACTT    |

---

**Mouse**

---

|                    |                        |
|--------------------|------------------------|
| Mif sense          | GAGGGGTTTCTGTCGGAGC    |
| Mif anti-sense     | GTTCGTGCCGCTAAAAGTCA   |
| Acta2 sense        | CCCAGACATCAGGGAGTAATGG |
| Acta2 anti-sense   | TCTATCGGATACTTCAGCGTCA |
| Coll1a1 sense      | GCTCCTCTAGGGGCCACT     |
| Coll1a1 anti-sense | ATTGGGACCCTTAGGCCAT    |
| Coll1a2 sense      | TCGTGCCTAGCAACATGCC    |

---

---

---

|                   |                          |
|-------------------|--------------------------|
| Col1a2 anti-sense | TTGTGCAGAATACTGAGCAGCAA  |
| Col5a3 sense      | CCCAAGCAAGTCAACATTATGGA  |
| Col5a3 anti-sense | CGGTTACAGTCAACCACCA      |
| Col6a3 sense      | GCTGCGGAATCACTTTGTGC     |
| Col6a3 anti-sense | CACCTTGACACCTTTCTGGGT    |
| Myh9 sense        | AGAAGTTGGTATGGGTGCCTT    |
| Myh9 anti-sense   | CCCTGAGTAGTATCGCTCCTTG   |
| Myh11 sense       | ATGAGGTGGTCGTGGAGTTG     |
| Myh11 anti-sense  | GCCTGAGAAGTATCGCTCCC     |
| Rgs5 sense        | CGCACTCATGCCTGGAAAG      |
| Rgs5 anti-sense   | TGAAGCTGGCAAATCCATAGC    |
| Mustn1 sense      | GTCTAAGACATACCAGGTCATGC  |
| Mustn1 anti-sense | GCGGCTGAATACAGATGGGG     |
| Mcam sense        | CCCAAAGTGGTGTGCGTCTT     |
| Mcam anti-sense   | GGAAAATCAGTATCTGCCTCTCC  |
| Cd36 sense        | ATGGGCTGTGATCGGAACTG     |
| Cd36 anti-sense   | GTCTTCCAATAAGCATGTCTCC   |
| Fabp4 sense       | AAGGTGAAGAGCATCATAACCCCT |
| Fabp4 anti-sense  | TCACGCCTTTCATAACACATTCC  |
| Fabp5 sense       | TGAAAGAGCTAGGAGTAGGACTG  |
| Fabp5 anti-sense  | CTCTCGGTTTTGACCGTGATG    |
| Fasn sense        | GGAGGTGGTGATAGCCGGTAT    |

---



---

---

|                   |                         |
|-------------------|-------------------------|
| Fasn anti-sense   | TGGGTAATCCATAGAGCCCAG   |
| Apoc1 sense       | TCCTGTCCTGATTGTGGTCGT   |
| Apoc1 anti-sense  | CCAAAGTGTTCCCAAACCTCCTT |
| Apoc2 sense       | ATGGGGTCTCGGTTCTTCCT    |
| Apoc2 anti-sense  | GTCTTCTGGTACAGGTCTTTGG  |
| Sh3bp5 sense      | GCCTGGAGAGGATCTCAGATG   |
| Sh3bp5 anti-sense | TCAGACGGACTCGTCGGTC     |
| Lum sense         | CTCTTGCCTTGGCATTAGTCG   |
| Lum anti-sense    | GGGGGCAGTTACATTCTGGTG   |
| Fap sense         | GTCACCTGATCGGCAATTTGT   |
| Fap anti-sense    | CCCCATTCTGAAGGTCGTAGAT  |
| Timp1 sense       | GCAACTCGGACCTGGTCATAA   |
| Timp1 anti-sense  | CGGCCCCGTGATGAGAAACT    |
| Twist1 sense      | GGACAAGCTGAGCAAGATTCA   |
| Twist1 anti-sense | CGGAGAAGGCGTAGCTGAG     |
| Mmp1 sense        | CCAGGGTGTTGGACTATGTTTG  |
| Mmp1 anti-sense   | CCCCGAGGAAGGTTTCATCTTTA |
| Mmp2 sense        | CAAGTTCCCCGGCGATGTC     |
| Mmp2 anti-sense   | TTCTGGTCAAGGTCACCTGTC   |
| H2-Aa sense       | TCAGTCGCAGACGGTGTTTAT   |
| H2-Aa anti-sense  | GGGGGCTGGAATCTCAGGT     |
| Cd74 sense        | AGTGCGACGAGAACGGTAAC    |

---

---



---

|                   |                      |
|-------------------|----------------------|
| Cd74 anti-sense   | CGTTGGGGAACACACACCA  |
| H2-Ab1 sense      | AGCCCCATCACTGTGGAGT  |
| H2-Ab1 anti-sense | GATGCCGCTCAACATCTTGC |

---

1

2 **Supplementary Table S5. The list of reagents and antibodies used in this study.**

---

| <b>Antibodies</b>     | <b>Identifier</b> | <b>Source</b>  |
|-----------------------|-------------------|----------------|
| APC anti-human CD36   | Cat: 561822       | BD Pharmingen  |
| PE anti-human HLA-DRA | Cat: FAB4869P     | R&D Systems    |
| CCL5                  | Cat# MAB678       | R&D systems    |
| IgG                   | Cat# 1-001-A      | R&D systems    |
| IKZF1                 | Cat #14859        | Cell Signaling |
| CEBPA                 | Cat # sc-365318   | Santa cruz     |
| CEBPD                 | Cat # sc-365546   | Santa Cruz     |
| $\beta$ -tubulin      | Cat# 2128         | Cell Signaling |
| CCL5                  | Cat# 2988S        | Cell Signaling |
| CD36                  | Cat# ab252922     | Abcam          |
| MIF                   | Cat# ab187064     | Abcam          |
| p65                   | Cat# ab32536      | Abcam          |
| SOX2                  | Cat# ab92494      | Abcam          |
| OCT4                  | Cat# ab181557     | Abcam          |
| STAT3                 | Cat# ab68153      | Abcam          |
| HLA-DRA               | Cat# ab92511      | Abcam          |

---

---

|                                                    |                               |               |
|----------------------------------------------------|-------------------------------|---------------|
| ACTA2                                              | Cat #ab7817                   | Abcam         |
| CD33                                               | Cat # ab269456                | Abcam         |
| CD11b                                              | Cat # ab133357                | Abcam         |
| FOXP3                                              | Cat #ab20034                  | Abcam         |
| CD4                                                | Cat #ab183685                 | Abcam         |
| MYH11                                              | Cat # ab224804                | Abcam         |
| LUM                                                | Cat # ab168348                | Abcam         |
| CXCL13                                             | Cat #ab199043                 | Abcam         |
| CD8                                                | Cat # ab217344                | Abcam         |
| CXCR5                                              | Cat #ab254415                 | Abcam         |
| CD20                                               | Cat #ab78237                  | Abcam         |
| BUV395 anti-mouse CD8a                             | Cat# 563786; RRID: AB_2732919 | BD Pharmingen |
| PE/Cy7 anti-mouse IFN-g                            | Cat# 505826; RRID: AB_2295770 | BioLegend     |
| FITZ anti-mouse GZMB                               | Cat# 515403; RRID: AB_2114575 | BioLegend     |
| BUV737 anti-mouse CD4                              | Cat# 612761; RRID: AB_2870092 | BD Pharmingen |
| FITC anti-human CD33                               | Cat# 366619                   | BioLegend     |
| APC anti-mouse/human CD11b                         | Cat# 101211                   | BioLegend     |
| PE anti-human HLA-DR                               | Cat# 327007                   | BioLegend     |
| Alexa Fluor® 647 anti-<br>mouse/rat/human FOXP3    | Cat# 320013                   | BioLegend     |
| Alexa Fluor® 647 anti-mouse Ly-<br>6G/Ly-6C (Gr-1) | Cat# 108418                   | BioLegend     |

---

---



---

|                                                        |                                     |                |
|--------------------------------------------------------|-------------------------------------|----------------|
| APC-eFluor 780 anti-Mouse CD3                          | Cat# 47-0032-82; RRID: AB_1272181   | Invitrogen     |
| FITC anti-mouse CD25                                   | Cat# 102005                         | BioLegend      |
| Brilliant Violet 711 anti-mouse CD45                   | Cat# 103147; RRID: AB_2564383       | BioLegend      |
| Phospho-p38<br>(Thr180/Tyr182) (D3F9) XP Rabbit<br>mAb | MAPK<br>Cat# 4511; RRID: AB_2139682 | Cell Signaling |

---

**Buffers, chemicals, peptides, and recombinant proteins**

---

|                                                    |                |                 |
|----------------------------------------------------|----------------|-----------------|
| BODIPY FL C16                                      | Cat# D3821     | ThermoFisher    |
| BODIPY500/510 C1, C12                              | Cat# 3823      | ThermoFisher    |
| Oxidized LDL Uptake Assay Kit                      | Cat# 601180    | Cayman Chemical |
| Human DiI High Oxidized Low<br>Density Lipoprotein | Cat# 770262-9  | Kalenbiomed     |
| BODIPY FL LDL                                      | Cat# L3483     | ThermoFisher    |
| DMEM                                               | Cat# 11965118  | GIBCO           |
| RPMI 1640 Medium                                   | Cat# 21875034  | GIBCO           |
| PBS                                                | Cat# 20012-068 | GIBCO           |
| Recombinant human MIF                              | Cat# HY-P7387  | MedChemExpress  |
| OxLDL                                              | Cat# 770252-7  | Kalenbiomed     |
| LDL                                                | Cat# 770200-4  | Kalenbiomed     |
| a-Tocopherol                                       | Cat# 30776     | Cayman Chemical |
| SB203580                                           | Cat# 13067     | Cayman Chemical |
| ISO-1                                              | Cat# HY-16692  | MedChemExpress  |

---

---

---

|                              |               |                |
|------------------------------|---------------|----------------|
| Stattic                      | Cat# HY-13818 | MedChemExpress |
| Sulfo-N-succinimidyl Oleate  | Cat# SML2148  | Sigma-Aldrich  |
| Lipid Peroxidation Assay Kit | Cat# ab243377 | Abcam          |

---
